# Supplementary material for: Reducing Boolean networks with backward equivalence
Source: Springer Nature journal article supplement (doi:10.1186/s12859-023-05326-9), 2023-05-23
Supplement: 12859_2023_5326_MOESM5_ESM.pdf [file 12859_2023_5326_MOESM5_ESM.pdf]

5 Tables

| Model ID | URL                                                                                                                                 | Size |       |       | Reduction Ratio |       |
|----------|-------------------------------------------------------------------------------------------------------------------------------------|------|-------|-------|-----------------|-------|
|          |                                                                                                                                     | $N$  | $N_i$ | $N_m$ | $R_i$           | $R_m$ |
| 1 50     | <a href="https://ginsim.org/node/97">ginsim.org/node/97</a>                                                                         | 26   | 7     | 4     | 26.92           | 15.38 |
| 2 51     | <a href="https://www.ebi.ac.uk/biomodels/MODEL1606020000">www.ebi.ac.uk/biomodels/MODEL1606020000</a>                               | 19   | 11    | 3     | 57.89           | 15.79 |
| 3 50     | <a href="https://ginsim.org/node/126">ginsim.org/node/126</a>                                                                       | 24   | 11    | 4     | 45.83           | 16.67 |
| 4 52     | <a href="https://ginsim.org/model/drosophila_mesoderm">ginsim.org/model/drosophila_mesoderm</a>                                     | 57   | 34    | 11    | 59.65           | 19.3  |
| 5 53     | <a href="https://www.ebi.ac.uk/biomodels/BIOMD0000000592">www.ebi.ac.uk/biomodels/BIOMD0000000592</a>                               | 10   | 2     | 2     | 20.0            | 20.0  |
| 6 53     | <a href="https://www.ebi.ac.uk/biomodels/BIOMD0000000593">www.ebi.ac.uk/biomodels/BIOMD0000000593</a>                               | 18   | 13    | 4     | 72.22           | 22.22 |
| 7 54     | <a href="https://ginsim.org/model/eggshell_patterning">ginsim.org/model/eggshell_patterning</a>                                     | 8    | 4     | 2     | 50.0            | 25.0  |
| 8 50     | <a href="https://ginsim.org/node/115">ginsim.org/node/115</a>                                                                       | 16   | 8     | 5     | 50.0            | 31.25 |
| 9 50     | <a href="https://ginsim.org/node/102">ginsim.org/node/102</a>                                                                       | 23   | 13    | 8     | 56.52           | 34.78 |
| 10 50    | <a href="https://ginsim.org/node/109">ginsim.org/node/109</a>                                                                       | 19   | 8     | 7     | 42.11           | 36.84 |
| 11 50    | <a href="https://ginsim.org/node/144">ginsim.org/node/144</a>                                                                       | 24   | 11    | 9     | 45.83           | 37.5  |
| 12 55    | <a href="https://ginsim.org/model/sex_determination_mammals">ginsim.org/model/sex_determination_mammals</a>                         | 37   | 16    | 14    | 43.24           | 37.84 |
| 13 50    | <a href="https://ginsim.org/node/96">ginsim.org/node/96</a>                                                                         | 34   | 23    | 15    | 67.65           | 44.12 |
| 14 50    | <a href="https://ginsim.org/node/160">ginsim.org/node/160</a>                                                                       | 18   | 11    | 8     | 61.11           | 44.44 |
| 15 56    | <a href="https://ginsim.org/node/183">ginsim.org/node/183</a>                                                                       | 30   | 25    | 14    | 83.33           | 46.67 |
| 16 54    | <a href="https://ginsim.org/model/eggshell_patterning">ginsim.org/model/eggshell_patterning</a>                                     | 24   | 15    | 12    | 62.5            | 50.0  |
| 17 57    | <a href="https://www.ebi.ac.uk/biomodels/MODEL2101150001">www.ebi.ac.uk/biomodels/MODEL2101150001</a>                               | 92   | 72    | 46    | 78.26           | 50.0  |
| 18 58    | <a href="https://ginsim.org/node/185">ginsim.org/node/185</a>                                                                       | 103  | 54    | 52    | 52.43           | 50.49 |
| 19 59    | <a href="https://ginsim.org/model/immune_checkpoints">ginsim.org/model/immune_checkpoints</a>                                       | 66   | 43    | 35    | 65.15           | 53.03 |
| 20 60    | <a href="https://www.ebi.ac.uk/biomodels/MODEL1506260002">www.ebi.ac.uk/biomodels/MODEL1506260002</a>                               | 45   | 24    | 24    | 53.33           | 53.33 |
| 21 50    | <a href="https://ginsim.org/node/89">ginsim.org/node/89</a>                                                                         | 18   | 11    | 10    | 61.11           | 55.56 |
| 22 61    | <a href="https://ginsim.org/node/79">ginsim.org/node/79</a>                                                                         | 36   | 23    | 21    | 63.89           | 58.33 |
| 23 61    | <a href="https://ginsim.org/node/79">ginsim.org/node/79</a>                                                                         | 71   | 44    | 42    | 61.97           | 59.15 |
| 24 62    | <a href="https://ginsim.org/model/monocytes-to-dc">ginsim.org/model/monocytes-to-dc</a>                                             | 96   | 81    | 57    | 84.38           | 59.38 |
| 25 63    | <a href="https://www.ebi.ac.uk/biomodels/MODEL1506260000">www.ebi.ac.uk/biomodels/MODEL1506260000</a>                               | 82   | 49    | 49    | 59.76           | 59.76 |
| 26 3     | <a href="https://www.ebi.ac.uk/biomodels/MODEL1504170000">www.ebi.ac.uk/biomodels/MODEL1504170000</a>                               | 10   | 7     | 6     | 70.0            | 60.0  |
| 27 3     | <a href="https://www.ebi.ac.uk/biomodels/MODEL1504170003">www.ebi.ac.uk/biomodels/MODEL1504170003</a>                               | 10   | 7     | 6     | 70.0            | 60.0  |
| 28 64    | <a href="https://ginsim.org/node/236">ginsim.org/node/236</a>                                                                       | 41   | 27    | 25    | 65.85           | 60.98 |
| 29 65    | <a href="https://ginsim.org/model/tcell-checkpoint-inhibitors-tcla4-pd1">ginsim.org/model/tcell-checkpoint-inhibitors-tcla4-pd1</a> | 218  | 140   | 136   | 64.22           | 62.39 |
| 30 55    | <a href="https://ginsim.org/model/sex_determination_mammals">ginsim.org/model/sex_determination_mammals</a>                         | 19   | 14    | 12    | 73.68           | 63.16 |
| 31 3     | <a href="https://www.ebi.ac.uk/biomodels/MODEL1504170002">www.ebi.ac.uk/biomodels/MODEL1504170002</a>                               | 9    | 7     | 6     | 77.78           | 66.67 |
| 32 3     | <a href="https://www.ebi.ac.uk/biomodels/MODEL1504170001">www.ebi.ac.uk/biomodels/MODEL1504170001</a>                               | 9    | 7     | 6     | 77.78           | 66.67 |
| 33 66    | <a href="https://ginsim.org/node/26">ginsim.org/node/26</a>                                                                         | 12   | 12    | 8     | 100.0           | 66.67 |
| 34 30    | <a href="https://ginsim.org/node/225">ginsim.org/node/225</a>                                                                       | 42   | 37    | 29    | 88.1            | 69.05 |
| 35 67    | <a href="https://ginsim.org/node/227">ginsim.org/node/227</a>                                                                       | 28   | 22    | 20    | 78.57           | 71.43 |
| 36 31    | <a href="https://ginsim.org/node/78">ginsim.org/node/78</a>                                                                         | 40   | 29    | 29    | 72.5            | 72.5  |
| 37 68    | <a href="https://ginsim.org/node/180">ginsim.org/node/180</a>                                                                       | 48   | 38    | 35    | 79.17           | 72.92 |
| 38 45    | <a href="https://ginsim.org/node/173">ginsim.org/node/173</a>                                                                       | 53   | 41    | 39    | 77.36           | 73.58 |
| 39 30    | <a href="https://ginsim.org/node/225">ginsim.org/node/225</a>                                                                       | 128  | 103   | 95    | 80.47           | 74.22 |
| 40 45    | <a href="https://ginsim.org/node/173">ginsim.org/node/173</a>                                                                       | 16   | 12    | 12    | 75.0            | 75.0  |
| 41 69    | <a href="https://ginsim.org/node/39">ginsim.org/node/39</a>                                                                         | 20   | 15    | 15    | 75.0            | 75.0  |
| 42 67    | <a href="https://ginsim.org/node/227">ginsim.org/node/227</a>                                                                       | 33   | 26    | 25    | 78.79           | 75.76 |
| 43 45    | <a href="https://ginsim.org/node/173">ginsim.org/node/173</a>                                                                       | 17   | 13    | 13    | 76.47           | 76.47 |
| 44 70    | <a href="https://www.ebi.ac.uk/biomodels/MODEL1305240000">www.ebi.ac.uk/biomodels/MODEL1305240000</a>                               | 30   | 23    | 23    | 76.67           | 76.67 |
| 45 71    | <a href="https://www.ebi.ac.uk/biomodels/MODEL2004040001">www.ebi.ac.uk/biomodels/MODEL2004040001</a>                               | 56   | 44    | 43    | 78.57           | 76.79 |
| 46 72    | <a href="https://www.ebi.ac.uk/biomodels/BIOMD0000000562">www.ebi.ac.uk/biomodels/BIOMD0000000562</a>                               | 28   | 22    | 22    | 78.57           | 78.57 |
| 47 66    | <a href="https://ginsim.org/node/25">ginsim.org/node/25</a>                                                                         | 39   | 31    | 31    | 79.49           | 79.49 |
| 48 73    | <a href="https://ginsim.org/node/188">ginsim.org/node/188</a>                                                                       | 35   | 31    | 28    | 88.57           | 80.0  |
| 49 74    | <a href="https://ginsim.org/node/69">ginsim.org/node/69</a>                                                                         | 10   | 8     | 8     | 80.0            | 80.0  |
| 50 75    | <a href="https://ginsim.org/model/sex_determination_chicken">ginsim.org/model/sex_determination_chicken</a>                         | 10   | 8     | 8     | 80.0            | 80.0  |
| 51 76    | <a href="https://www.ebi.ac.uk/biomodels/MODEL1610060000">www.ebi.ac.uk/biomodels/MODEL1610060000</a>                               | 31   | 26    | 25    | 83.87           | 80.65 |
| 52 77    | <a href="https://ginsim.org/node/248">ginsim.org/node/248</a>                                                                       | 37   | 32    | 30    | 86.49           | 81.08 |
| 53 66    | <a href="https://ginsim.org/node/29">ginsim.org/node/29</a>                                                                         | 16   | 13    | 13    | 81.25           | 81.25 |
| 54 50    | <a href="https://ginsim.org/node/152">ginsim.org/node/152</a>                                                                       | 11   | 9     | 9     | 81.82           | 81.82 |
| 55 66    | <a href="https://ginsim.org/node/21">ginsim.org/node/21</a>                                                                         | 50   | 41    | 41    | 82.0            | 82.0  |
| 56 30    | <a href="https://ginsim.org/node/225">ginsim.org/node/225</a>                                                                       | 110  | 91    | 91    | 82.73           | 82.73 |
| 57 45    | <a href="https://ginsim.org/node/173">ginsim.org/node/173</a>                                                                       | 18   | 15    | 15    | 83.33           | 83.33 |
| 58 78    | <a href="https://ginsim.org/node/50">ginsim.org/node/50</a>                                                                         | 6    | 6     | 5     | 100.0           | 83.33 |
| 59 79    | <a href="https://ginsim.org/model/HSPC_MSC">ginsim.org/model/HSPC_MSC</a>                                                           | 26   | 23    | 22    | 88.46           | 84.62 |
| 60 80    | <a href="https://ginsim.org/node/82">ginsim.org/node/82</a>                                                                         | 7    | 6     | 6     | 85.71           | 85.71 |
| 61 80    | <a href="https://ginsim.org/node/82">ginsim.org/node/82</a>                                                                         | 7    | 6     | 6     | 85.71           | 85.71 |
| 62 81    | <a href="https://ginsim.org/node/31">ginsim.org/node/31</a>                                                                         | 14   | 12    | 12    | 85.71           | 85.71 |
| 63 82    | <a href="https://ginsim.org/node/41">ginsim.org/node/41</a>                                                                         | 21   | 18    | 18    | 85.71           | 85.71 |
| 64 76    | <a href="https://www.ebi.ac.uk/biomodels/MODEL1610060001">www.ebi.ac.uk/biomodels/MODEL1610060001</a>                               | 29   | 27    | 25    | 93.1            | 86.21 |
| 65 75    | <a href="https://ginsim.org/model/sex_determination_chicken">ginsim.org/model/sex_determination_chicken</a>                         | 15   | 13    | 13    | 86.67           | 86.67 |
| 66 20    | <a href="https://ginsim.org/node/87">ginsim.org/node/87</a>                                                                         | 60   | 52    | 52    | 86.67           | 86.67 |
| 67 83    | <a href="https://ginsim.org/node/71">ginsim.org/node/71</a>                                                                         | 56   | 50    | 50    | 89.29           | 89.29 |
| 68 84    | <a href="https://ginsim.org/model/SP">ginsim.org/model/SP</a>                                                                       | 19   | 17    | 17    | 89.47           | 89.47 |
| 69 81    | <a href="https://ginsim.org/node/37">ginsim.org/node/37</a>                                                                         | 10   | 9     | 9     | 90.0            | 90.0  |
| 70 81    | <a href="https://ginsim.org/node/37">ginsim.org/node/37</a>                                                                         | 10   | 9     | 9     | 90.0            | 90.0  |
| 71 85    | <a href="https://ginsim.org/model/signalling-prostate-cancer">ginsim.org/model/signalling-prostate-cancer</a>                       | 133  | 121   | 121   | 90.98           | 90.98 |
| 72 86    | <a href="https://ginsim.org/node/229">ginsim.org/node/229</a>                                                                       | 133  | 124   | 122   | 93.23           | 91.73 |
| 73 87    | <a href="https://ginsim.org/model/T2DM">ginsim.org/model/T2DM</a>                                                                   | 26   | 24    | 24    | 92.31           | 92.31 |
| 74 88    | <a href="https://ginsim.org/node/194">ginsim.org/node/194</a>                                                                       | 14   | 13    | 13    | 92.86           | 92.86 |
| 75 86    | <a href="https://ginsim.org/node/229">ginsim.org/node/229</a>                                                                       | 53   | 50    | 50    | 94.34           | 94.34 |
| 76 89    | <a href="https://ginsim.org/node/240">ginsim.org/node/240</a>                                                                       | 18   | 17    | 17    | 94.44           | 94.44 |
| 77 90    | <a href="https://ginsim.org/node/191">ginsim.org/node/191</a>                                                                       | 20   | 19    | 19    | 95.0            | 95.0  |
| 78 91    | <a href="https://ginsim.org/node/234">ginsim.org/node/234</a>                                                                       | 61   | 58    | 58    | 95.08           | 95.08 |
| 79 90    | <a href="https://ginsim.org/node/191">ginsim.org/node/191</a>                                                                       | 32   | 31    | 31    | 96.88           | 96.88 |
| 80 92    | <a href="https://ginsim.org/node/216">ginsim.org/node/216</a>                                                                       | 34   | 33    | 33    | 97.06           | 97.06 |
| 81 80    | <a href="https://ginsim.org/node/82">ginsim.org/node/82</a>                                                                         | 7    | 7     | 7     | 100.0           | 100.0 |
| 82 93    | <a href="https://ginsim.org/node/189">ginsim.org/node/189</a>                                                                       | 14   | 14    | 14    | 100.0           | 100.0 |
| 83 7     | <a href="https://ginsim.org/node/4">ginsim.org/node/4</a>                                                                           | 10   | 10    | 10    | 100.0           | 100.0 |
| 84 93    | <a href="https://ginsim.org/node/189">ginsim.org/node/189</a>                                                                       | 13   | 13    | 13    | 100.0           | 100.0 |
| 85 80    | <a href="https://ginsim.org/node/82">ginsim.org/node/82</a>                                                                         | 7    | 7     | 7     | 100.0           | 100.0 |
| 86 94    | <a href="https://ginsim.org/model/p53-Mdm2">ginsim.org/model/p53-Mdm2</a>                                                           | 6    | 6     | 6     | 100.0           | 100.0 |

Table S3: Large-scale application of BBE on the repositories GINsim and Biomodels. *Model ID* gives the model identifier as in Fig. 2 and a reference. *URL* allows to download the model from the repositories. *Size* presents the number of variables in the original BN, and in its IS and maximal reduction ( $N$ ,  $N_i$ ,  $N_m$  resp.). The last column contains the ratios:  $R_i = N_i/N$  and  $R_m = N_m/N$ . In most of the cases, BBE took less than a second. The largest runtime is about 2 seconds.

| Model ID | Original |          | IS Reduced |          | Max Reduced |          |
|----------|----------|----------|------------|----------|-------------|----------|
|          | $N$      | Time (s) | $N_i$      | Time (s) | $N_m$       | Time (s) |
| 1 [50]   | 26       | time-out | 7          | 0.046    | 4           | 0.048    |
| 2 [51]   | 19       | 21.739   | 11         | 0.433    | 3           | 0.037    |
| 3 [50]   | 24       | time-out | 11         | 5.768    | 4           | 0.041    |
| 4 [52]   | 57       | time-out | 34         | time-out | 11          | 0.453    |
| 6 [53]   | 18       | 12.470   | 13         | 2.749    | 4           | 0.038    |
| 8 [50]   | 16       | 2.581    | 8          | 0.265    | 5           | 0.229    |
| 9 [50]   | 23       | 339.396  | 13         | 0.259    | 8           | 0.042    |
| 10 [50]  | 19       | 20.333   | 8          | 6.931    | 7           | 5.472    |
| 11 [50]  | 24       | time-out | 11         | 0.089    | 9           | 0.055    |
| 12 [55]  | 37       | time-out | 16         | 2.492    | 14          | 0.954    |
| 13 [50]  | 34       | time-out | 23         | 417.864  | 15          | 1.191    |
| 14 [50]  | 18       | 7.836    | 11         | 4.178    | 8           | 2.759    |
| 15 [56]  | 30       | time-out | 25         | time-out | 14          | 0.485    |
| 16 [54]  | 24       | time-out | 15         | 6.602    | 12          | 0.179    |
| 21 [50]  | 18       | 11.608   | 11         | 0.116    | 10          | 0.079    |
| 22 [61]  | 36       | time-out | 23         | 440.921  | 21          | 96.438   |
| 30 [55]  | 19       | 21.901   | 14         | 0.568    | 12          | 0.180    |
| 35 [67]  | 28       | time-out | 22         | 167.489  | 20          | 39.467   |
| 40 [45]  | 16       | 3.554    | 12         | 0.265    | 12          | 0.251    |
| 41 [69]  | 20       | 37.951   | 15         | 0.972    | 15          | 0.968    |
| 43 [45]  | 17       | 9.598    | 13         | 1.751    | 13          | 1.256    |
| 44 [70]  | 30       | time-out | 23         | 346.175  | 23          | 338.690  |
| 46 [72]  | 28       | time-out | 22         | 160.363  | 22          | 166.330  |
| 53 [66]  | 16       | 3.800    | 13         | 0.647    | 13          | 0.652    |
| 57 [45]  | 18       | 12.099   | 15         | 1.270    | 15          | 1.307    |
| 59 [79]  | 26       | time-out | 23         | 425.386  | 22          | 202.055  |
| 62 [81]  | 14       | 0.655    | 12         | 0.155    | 12          | 0.185    |
| 63 [82]  | 21       | 88.812   | 18         | 10.205   | 18          | 10.148   |
| 65 [75]  | 15       | 1.159    | 13         | 0.326    | 13          | 0.305    |
| 68 [84]  | 19       | 21.972   | 17         | 4.465    | 17          | 4.397    |
| 74 [88]  | 14       | 2.228    | 13         | 0.894    | 13          | 0.897    |
| 76 [89]  | 18       | 11.451   | 17         | 4.376    | 17          | 4.453    |
| 77 [90]  | 20       | 43.676   | 19         | 23.144   | 19          | 22.595   |

Table S4: The table displays the results of the large-scale validation for STG generation. The first column contains the model identifier. Then, each 2-columns block *Original*, *IS Reduced*, and *Max Reduced* contains information on STG generation on the original BN and its IS and maximal reductions, respectively. In particular,  $N$ ,  $N_i$  and  $N_m$  contain the number of variables, while *Time* contains the time in seconds, averaged over 3 runs, for STG generation by PyBoolNet.

| Model ID | $N$ | Original   |          | IS Reduced |            |          | Max Reduced |            |          |
|----------|-----|------------|----------|------------|------------|----------|-------------|------------|----------|
|          |     | Attractors | Time (s) | $N_i$      | Attractors | Time (s) | $N_m$       | Attractors | Time (s) |
| 1 [50]   | 26  | 16384      | 16.771   | 7          | 2          | 0.002    | 4           | 2          | 0.002    |
| 2 [51]   | 19  | 2832       | 2.296    | 11         | 16         | 0.011    | 3           | 2          | 0.002    |
| 3 [50]   | 24  | 64         | 0.067    | 11         | 2          | 0.002    | 4           | 2          | 0.002    |
| 4 [52]   | 57  | 9984       | 20.124   | 34         | 4          | 0.009    | 11          | 2          | 0.002    |
| 5 [53]   | 10  | 125        | 0.072    | 2          | 2          | 0.001    | 2           | 2          | 0.001    |
| 6 [53]   | 18  | 339        | 0.283    | 13         | 14         | 0.011    | 4           | 2          | 0.002    |
| 7 [54]   | 8   | 24         | 0.030    | 4          | 3          | 0.002    | 2           | 2          | 0.001    |
| 8 [50]   | 16  | 512        | 0.367    | 8          | 2          | 0.0026   | 5           | 2          | 0.002    |
| 9 [50]   | 23  | 512        | 0.473    | 13         | 2          | 0.003    | 8           | 2          | 0.002    |
| 10 [50]  | 19  | 4110       | 3.284    | 8          | 2          | 0.002    | 7           | 2          | 0.002    |
| 11 [50]  | 24  | 8192       | 7.866    | 11         | 2          | 0.002    | 9           | 2          | 0.002    |
| 12 [55]  | 37  | 15459      | 21.847   | 16         | 16         | 0.014    | 14          | 12         | 0.010    |
| 13 [50]  | 34  | 1536       | 1.952    | 23         | 3          | 0.005    | 15          | 2          | 0.003    |
| 14 [50]  | 18  | 256        | 0.203    | 11         | 2          | 0.002    | 8           | 2          | 0.002    |
| 15 [56]  | 30  | 9          | 0.019    | 25         | 3          | 0.005    | 14          | 2          | 0.003    |
| 16 [54]  | 24  | 1596       | 1.572    | 15         | 9          | 0.009    | 12          | 4          | 0.004    |
| 17 [57]  | 92  | 7360       | 24.031   | 72         | 50         | 0.144    | 46          | 2          | 0.008    |
| 18 [58]  | 103 | –          | time-out | 54         | 9          | 0.145    | 52          | 9          | 0.126    |
| 19 [59]  | 66  | 77876      | 235.756  | 43         | 2          | 0.008    | 35          | 2          | 0.005    |
| 20 [60]  | 45  | 1          | 0.009    | 24         | 1          | 0.002    | 24          | 1          | 0.003    |
| 21 [50]  | 18  | 384        | 0.313    | 11         | 3          | 0.003    | 10          | 2          | 0.002    |
| 22 [61]  | 36  | 86358      | 118.792  | 23         | 12         | 0.014    | 21          | 12         | 0.013    |
| 23 [61]  | 71  | 121976     | 359.252  | 44         | 12         | 0.025    | 42          | 12         | 0.023    |
| 24 [62]  | 96  | 4          | 0.030    | 81         | 2          | 0.015    | 57          | 2          | 0.009    |
| 25 [63]  | 82  | 1          | 0.013    | 49         | 1          | 0.005    | 49          | 1          | 0.005    |
| 26 [3]   | 10  | 10         | 0.011    | 7          | 3          | 0.002    | 6           | 2          | 0.002    |
| 27 [3]   | 10  | 10         | 0.011    | 7          | 3          | 0.002    | 6           | 2          | 0.002    |
| 28 [64]  | 41  | 990        | 1.50     | 27         | 6          | 0.010    | 25          | 5          | 0.008    |
| 29 [65]  | 218 | –          | time-out | 140        | 68         | 2.433    | 136         | 68         | 2.182    |
| 30 [55]  | 19  | 308        | 0.255    | 14         | 10         | 0.009    | 12          | 7          | 0.006    |
| 31 [3]   | 9   | 7          | 0.009    | 7          | 4          | 0.003    | 6           | 3          | 0.002    |
| 32 [3]   | 9   | 7          | 0.009    | 7          | 4          | 0.003    | 6           | 3          | 0.002    |
| 34 [30]  | 42  | 2          | 0.010    | 37         | 2          | 0.005    | 29          | 2          | 0.004    |
| 35 [67]  | 28  | 97         | 0.121    | 22         | 23         | 0.025    | 20          | 23         | 0.023    |
| 36 [31]  | 40  | 8          | 0.019    | 29         | 2          | 0.005    | 29          | 2          | 0.005    |
| 37 [68]  | 48  | 22         | 0.047    | 38         | 4          | 0.009    | 35          | 3          | 0.007    |
| 38 [45]  | 53  | 40         | 0.138    | 41         | 17         | 0.038    | 39          | 17         | 0.034    |
| 39 [30]  | 128 | 8          | 0.072    | 103        | 2          | 0.0232   | 95          | 2          | 0.021    |
| 40 [45]  | 16  | 20         | 0.023    | 12         | 5          | 0.005    | 12          | 5          | 0.004    |
| 41 [69]  | 20  | 1          | 0.007    | 15         | 1          | 0.002    | 15          | 1          | 0.002    |
| 42 [67]  | 33  | 71         | 0.104    | 26         | 29         | 0.038    | 25          | 29         | 0.035    |
| 43 [45]  | 17  | 22         | 0.027    | 13         | 4          | 0.004    | 13          | 4          | 0.004    |
| 44 [70]  | 30  | 6          | 0.026    | 23         | 6          | 0.008    | 23          | 6          | 0.008    |
| 45 [71]  | 56  | 1972       | 4.250    | 44         | 2          | 0.009    | 43          | 2          | 0.009    |
| 46 [72]  | 28  | 2          | 0.009    | 22         | 2          | 0.003    | 22          | 2          | 0.004    |
| 47 [66]  | 39  | 3          | 1.387    | 31         | 3          | 0.073    | 31          | 3          | 0.072    |
| 48 [73]  | 35  | 62         | 0.102    | 31         | 8          | 0.015    | 28          | 8          | 0.014    |
| 49 [74]  | 10  | 1          | 0.005    | 8          | 1          | 0.002    | 8           | 1          | 0.002    |
| 50 [75]  | 10  | 48         | 0.032    | 8          | 12         | 0.007    | 8           | 12         | 0.007    |
| 51 [76]  | 31  | 53         | 0.072    | 26         | 23         | 0.028    | 25          | 17         | 0.021    |
| 52 [77]  | 37  | 57         | 0.136    | 32         | 2          | 0.008    | 30          | 2          | 0.007    |
| 53 [66]  | 16  | 2          | 0.008    | 13         | 2          | 0.003    | 13          | 2          | 0.003    |
| 54 [50]  | 11  | 4          | 0.007    | 9          | 2          | 0.002    | 9           | 2          | 0.002    |
| 55 [66]  | 50  | 1          | 2.343    | 41         | 1          | 0.134    | 41          | 1          | 0.134    |
| 56 [30]  | 110 | 4          | 0.030    | 91         | 2          | 0.016    | 91          | 2          | 0.016    |
| 57 [45]  | 18  | 22         | 0.027    | 15         | 5          | 0.005    | 15          | 5          | 0.006    |
| 59 [79]  | 26  | 6          | 0.017    | 23         | 3          | 0.006    | 22          | 3          | 0.006    |
| 60 [80]  | 7   | 1          | 0.005    | 6          | 1          | 0.002    | 6           | 1          | 0.001    |
| 61 [80]  | 7   | 1          | 0.005    | 6          | 1          | 0.001    | 6           | 1          | 0.001    |
| 62 [81]  | 14  | 1          | 0.006    | 12         | 1          | 0.002    | 12          | 1          | 0.002    |
| 63 [82]  | 21  | 8          | 0.014    | 18         | 8          | 0.009    | 18          | 8          | 0.009    |
| 64 [76]  | 29  | 27         | 0.096    | 27         | 15         | 0.021    | 25          | 8          | 0.013    |
| 65 [75]  | 15  | 48         | 0.041    | 13         | 12         | 0.010    | 13          | 12         | 0.010    |
| 66 [20]  | 60  | 264        | 0.676    | 52         | 6          | 0.022    | 52          | 6          | 0.021    |
| 67 [83]  | 56  | 3          | 0.034    | 50         | 3          | 0.016    | 50          | 3          | 0.019    |
| 68 [84]  | 19  | 19         | 0.024    | 17         | 5          | 0.006    | 17          | 5          | 0.006    |
| 69 [81]  | 10  | 13         | 0.014    | 9          | 5          | 0.004    | 9           | 5          | 0.004    |
| 70 [81]  | 10  | 2          | 0.006    | 9          | 2          | 0.002    | 9           | 2          | 0.002    |
| 71 [85]  | 133 | 7008       | 108.475  | 121        | 4          | 0.103    | 121         | 4          | 0.102    |
| 72 [86]  | 133 | 11         | 2.882    | 124        | 5          | 2.118    | 122         | 5          | 2.161    |
| 73 [87]  | 26  | 32         | 0.045    | 24         | 8          | 0.012    | 24          | 8          | 0.012    |
| 74 [88]  | 14  | 4          | 0.009    | 13         | 2          | 0.003    | 13          | 2          | 0.003    |
| 75 [86]  | 53  | 10         | 0.502    | 50         | 5          | 0.220    | 50          | 5          | 0.217    |
| 76 [89]  | 18  | 5          | 0.012    | 17         | 5          | 0.006    | 17          | 5          | 0.006    |
| 77 [90]  | 20  | 13         | 0.020    | 19         | 7          | 0.008    | 19          | 7          | 0.008    |
| 78 [91]  | 61  | 32         | 0.115    | 58         | 7          | 0.034    | 58          | 7          | 0.033    |
| 79 [90]  | 32  | 15         | 0.032    | 31         | 9          | 0.018    | 31          | 9          | 0.018    |
| 80 [92]  | 34  | 20         | 0.048    | 33         | 10         | 0.031    | 33          | 10         | 0.030    |

Table S5: The table contains the large-scale validation for the attractor analysis. The first column is the model identifier and its reference. Each 3-columns block *Original*, *IS Reduced*, and *Max Reduced* contains information on attractor computation on the original BN and its IS and maximal reductions, respectively. In particular,  $N$ ,  $N_i$ , and  $N_m$  contain the number of variables, while *Attractors* contains the number of attractors computed by tool BNS, and *Time* the time in seconds to obtain them averaged over 3 runs.
